# Supplementary material
Source: PubMed Central journal article supplement (PMC1088704)
Supplement: PB011023s01.pdf [file PB011023s01.pdf]

This is an electronic appendix to the paper by Pérez-Barbería & Gordon 2001 Relationships between oral morphology and feeding style in the Ungulata: a phylogenetically controlled evaluation. *Proc. R. Soc. Lond. B* **268**, 1023–1032. (DOI 10.1098/rspb.2003.1619.)

Electronic appendices are refereed with the text. However, no attempt has been made to impose a uniform editorial style on the electronic appendices.

## ELECTRONIC APPENDIX A

List of species, feeding styles (FS), body mass (BM, Kg) and traits of the oral morphology used in this study. MZW: muzzle width (cm); OSA: occlusal surface (cm<sup>2</sup>); TTV: molar row volume (cm<sup>3</sup>); M3H: height of M<sub>3</sub> (cm); M3V: volume of M<sub>3</sub> (cm<sup>3</sup>); IB: incisor breadth (cm); ICS: incisor protrusion; IWR: incisor shape; IAP: incisor arcade shape; B: browser; M: mixed feeder; G: grazer. See Methods for definitions of the traits.

| Species                           | FS | BM     | MZ<br>W | OSA  | TTV    | M3H  | M3V    | IB  | ICS  | IWR  | IAP  |
|-----------------------------------|----|--------|---------|------|--------|------|--------|-----|------|------|------|
| <i>Loxodonta africana</i>         | M  | 3828.5 | --      | --   | 7610.0 | 20.0 | 4160.0 | --  | --   | --   | --   |
| <i>Elephas maximus</i>            | M  | 2786.5 | --      | --   | --     | --   | --     | --  | --   | --   | --   |
| <i>Tapirus indicus</i>            | B  | 317.5  | 5.0     | --   | 41.8   | 1.6  | 9.7    | --  | --   | --   | --   |
| <i>Tapirus terrestris</i>         | B  | 199.7  | 4.2     | --   | 28.8   | 1.6  | 7.2    | --  | --   | --   | --   |
| <i>Tapirus bairdi</i>             | B  | 300.0  | --      | --   | --     | --   | --     | --  | --   | --   | --   |
| <i>Dicerorhinus sumatrensis</i>   | B  | 950.0  | 6.2     | --   | 149.4  | 3.3  | 26.9   | --  | --   | --   | --   |
| <i>Rhinoceros sondaicus</i>       | B  | 1750.0 | 8.3     | --   | 193.2  | 4.2  | 43.6   | --  | --   | --   | --   |
| <i>Rhinoceros unicornis</i>       | M  | 1900.0 | 9.6     | --   | 226.9  | 4.1  | 56.1   | --  | --   | --   | --   |
| <i>Diceros bicornis</i>           | B  | 1002.6 | 4.8     | --   | 250.4  | 5.1  | 54.8   | --  | --   | --   | --   |
| <i>Ceratotherium simum</i>        | G  | 2008.3 | 7.4     | --   | 535.2  | 10.1 | 151.1  | --  | --   | --   | --   |
| <i>Equus africanus</i>            | G  | 220.0  | --      | --   | --     | --   | --     | --  | --   | --   | --   |
| <i>Equus hemionus</i>             | G  | 221.0  | 5.7     | --   | 159.0  | 7.5  | 25.9   | --  | --   | --   | --   |
| <i>Equus kiang</i>                | G  | 300.0  | --      | --   | --     | --   | --     | --  | --   | --   | --   |
| <i>Equus grevyi</i>               | G  | 400.3  | 5.9     | --   | 171.9  | 7.9  | 32.2   | --  | --   | --   | --   |
| <i>Equus burchelli</i>            | G  | 285.3  | 6.5     | --   | 111.9  | 6.8  | 21.0   | --  | --   | --   | --   |
| <i>Equus zebra</i>                | G  | 281.0  | 6.5     | --   | 171.9  | 8.8  | 30.8   | --  | --   | --   | --   |
| <i>Equus przewalskii</i>          | G  | 250.0  | 6.2     | --   | --     | --   | --     | --  | --   | --   | --   |
| <i>Hylochoerus meinertzhageni</i> | B  | 130.3  | --      | --   | 21.4   | 2.1  | 12.2   | --  | --   | --   | --   |
| <i>Phacochoerus aethiopicus</i>   | G  | 70.0   | --      | --   | 31.7   | 5.0  | 24.3   | --  | --   | --   | --   |
| <i>Hippopotamus amphibius</i>     | G  | 1385.2 | --      | --   | 367.7  | 6.4  | 146.5  | --  | --   | --   | --   |
| <i>Choeropsis liberiensis</i>     | B  | 235.0  | --      | --   | 35.1   | 2.3  | 12.9   | --  | --   | --   | --   |
| <i>Camelus bactrianus</i>         | M  | 550.0  | --      | --   | 133.3  | 5.9  | 62.9   | --  | --   | --   | --   |
| <i>Camelus dromedarius</i>        | M  | 545.0  | 4.9     | 27.1 | 125.7  | 5.3  | 58.5   | --  | 0.04 | 0.80 | --   |
| <i>Lama guanicoe</i>              | M  | 104.3  | 2.8     | 7.4  | 20.8   | 3.4  | 8.9    | --  | --   | 1.06 | --   |
| <i>Vicugna vicugna</i>            | M  | 39.0   | 2.4     | 5.0  | 13.5   | 3.6  | 6.7    | --  | --   | 1.50 | --   |
| <i>Hyemoschus aquaticus</i>       | B  | 10.9   | 1.5     | 2.6  | 2.0    | 0.7  | 0.6    | 1.5 | --   | 3.07 | 1.49 |
| <i>Tragulus meminna</i>           | B  | 3.9    | 1.4     | 1.3  | 0.8    | 0.7  | 0.3    | --  | --   | --   | --   |

|                                 |   |        |      |      |       |     |      |      |      |      |      |
|---------------------------------|---|--------|------|------|-------|-----|------|------|------|------|------|
| <i>Tragulus javanicus</i>       | B | 1.4    | 1.2  | 1.0  | 0.6   | 0.5 | 0.2  | 1.0  | 0.05 | --   | --   |
| <i>Tragulus napu</i>            | B | 5.9    | 1.5  | 1.3  | --    | --  | --   | 1.2  | --   | --   | 1.63 |
| <i>Giraffa camelopardalis</i>   | B | 1002.3 | 7.9  | 28.5 | 60.9  | 2.3 | 16.6 | 8.0  | --   | 2.24 | 2.09 |
| <i>Okapia johnstoni</i>         | B | 200.0  | 5.2  | 20.1 | 33.9  | 2.0 | 10.7 | 4.4  | 0.05 | 1.81 | 1.46 |
| <i>Boselaphus tragocamelus</i>  | M | 194.8  | 4.9  | 13.5 | 35.4  | 3.7 | 14.0 | --   | --   | 1.60 | --   |
| <i>Tetracerus quadricornis</i>  | G | 17.5   | 2.1  | 3.4  | 3.8   | 2.9 | 1.5  | --   | --   | 2.42 | --   |
| <i>Synceros caffer</i>          | G | 555.2  | 10.0 | 20.7 | 77.6  | 4.8 | 29.5 | 9.3  | --   | 0.99 | 1.14 |
| <i>Bubalus bubalis</i>          | G | 1000.0 | --   | --   | --    | --  | --   | 10.0 | --   | --   | 1.14 |
| <i>Bubalus depressicornis</i>   | M | 150.5  | 4.2  | 6.4  | --    | --  | --   | --   | --   | --   | --   |
| <i>Bos gaurus</i>               | G | 775.1  | 8.9  | 21.5 | 102.0 | 6.2 | 41.0 | 9.4  | 0.22 | 1.38 | 1.38 |
| <i>Bos javanicus</i>            | M | 600.0  | 7.2  | 18.3 | --    | --  | --   | 8.1  | --   | --   | --   |
| <i>Bos taurus</i>               | M | 355.8  | --   | --   | --    | --  | --   | 8.0  | --   | --   | 1.27 |
| <i>Bos grunniens</i>            | G | 448.3  | --   | --   | --    | --  | --   | 9.3  | --   | --   | 1.43 |
| <i>Bison bison</i>              | G | 624.0  | 9.4  | 20.9 | 120.6 | 7.3 | 46.7 | 9.0  | --   | 1.13 | 1.17 |
| <i>Bison bonasus</i>            | M | 570.5  | 8.6  | 17.9 | 91.0  | 7.3 | 32.5 | 7.5  | --   | --   | 1.40 |
| <i>Tragelaphus euryceros</i>    | M | 284.7  | --   | --   | 28.7  | 2.5 | 11.0 | --   | --   | --   | --   |
| <i>Tragelaphus scriptus</i>     | B | 40.4   | 2.9  | 4.1  | 5.1   | 1.7 | 2.2  | 2.5  | --   | 5.59 | 1.48 |
| <i>Tragelaphus spekei</i>       | M | 81.3   | 3.4  | 6.3  | 9.5   | 2.3 | 3.7  | 3.1  | --   | --   | 1.54 |
| <i>Tragelaphus imberbis</i>     | B | 78.9   | 3.7  | 8.2  | 12.2  | 1.9 | 5.0  | --   | --   | 4.85 | --   |
| <i>Tragelaphus angasi</i>       | M | 87.3   | 3.8  | 7.9  | 12.3  | 2.3 | 5.4  | 3.7  | --   | 4.93 | 1.47 |
| <i>Tragelaphus strepsiceros</i> | B | 200.0  | 5.2  | 13.9 | 35.6  | 3.1 | 13.6 | 5.1  | 0.04 | 4.99 | 1.74 |
| <i>Tragelaphus derbianus</i>    | M | 552.0  | --   | --   | --    | --  | --   | --   | --   | --   | --   |
| <i>Tragelaphus oryx</i>         | M | 531.5  | --   | --   | --    | --  | --   | 6.5  | 0.07 | 2.97 | 1.58 |
| <i>Tragelaphus buxtoni</i>      | B | 199.3  | 5.0  | 10.9 | 22.3  | 2.5 | 8.9  | --   | --   | 4.05 | --   |
| <i>Oreotragus oreotragus</i>    | B | 12.1   | 1.5  | 2.3  | 3.0   | 1.7 | 1.0  | 1.5  | 0.03 | 2.41 | 1.47 |
| <i>Madoqua kirki</i>            | B | 4.9    | 0.6  | 1.3  | 1.2   | 1.0 | 0.3  | 1.1  | --   | 2.85 | 1.72 |
| <i>Madoqua saltiana</i>         | B | 2.5    | --   | --   | --    | --  | --   | --   | --   | --   | --   |
| <i>Madoqua guentheri</i>        | B | 4.1    | 0.6  | 1.3  | --    | --  | --   | 1.2  | --   | --   | 1.70 |
| <i>Raphicerus sharpei</i>       | M | 7.6    | --   | --   | --    | --  | --   | 1.4  | --   | --   | 1.38 |
| <i>Raphicerus melanotis</i>     | M | 10.6   | 1.4  | 1.8  | 1.7   | 1.1 | 0.6  | --   | --   | 4.03 | --   |
| <i>Raphicerus campestris</i>    | M | 11.1   | 1.4  | 1.9  | 2.0   | 1.5 | 0.8  | 1.5  | --   | 3.59 | 1.46 |
| <i>Neotragus pygmaeus</i>       | B | 2.1    | 1.1  | 1.1  | 0.8   | 1.1 | 0.4  | --   | --   | --   | --   |
| <i>Neotragus batesi</i>         | B | 2.6    | --   | --   | --    | --  | --   | --   | --   | --   | --   |
| <i>Neotragus moschatus</i>      | B | 4.9    | 1.2  | 1.3  | 1.2   | 1.3 | 0.5  | 1.2  | --   | 3.75 | 1.36 |
| <i>Dorcatragus megalotis</i>    | M | 10.3   | 1.2  | 2.2  | 2.0   | 1.2 | 0.6  | --   | --   | 3.60 | --   |
| <i>Ourebia ourebi</i>           | M | 14.6   | --   | --   | 4.3   | 2.1 | 1.7  | 2.2  | --   | 3.17 | 1.42 |
| <i>Gazella rufifrons</i>        | M | 23.8   | --   | --   | --    | --  | --   | --   | 0.03 | --   | --   |
| <i>Gazella thomsoni</i>         | M | 20.2   | 1.7  | 3.3  | 9.3   | 2.3 | 2.5  | 2.4  | 0.06 | 3.38 | 1.52 |
| <i>Gazella granti</i>           | M | 59.0   | 2.4  | 5.9  | 11.7  | 2.8 | 5.6  | 2.9  | 0.04 | 4.13 | 1.47 |
| <i>Gazella soemmerringi</i>     | M | 39.5   | --   | --   | --    | --  | --   | --   | --   | --   | --   |
| <i>Gazella dama</i>             | M | 59.5   | --   | --   | --    | --  | --   | --   | --   | --   | --   |
| <i>Gazella dorcas</i>           | M | 14.8   | --   | --   | 4.1   | 1.9 | 1.6  | --   | --   | --   | --   |
| <i>Gazella spekei</i>           | M | 19.0   | --   | --   | --    | --  | --   | --   | --   | --   | --   |
| <i>Gazella leptoceros</i>       | M | 24.0   | --   | --   | --    | --  | --   | --   | --   | --   | --   |
| <i>Gazella cuvieri</i>          | M | 24.9   | --   | --   | --    | --  | --   | --   | --   | --   | --   |
| <i>Gazella subgutturosa</i>     | M | 25.2   | --   | --   | --    | --  | --   | --   | --   | --   | --   |
| <i>Gazella gazella</i>          | M | 22.0   | --   | --   | --    | --  | --   | --   | --   | --   | --   |
| <i>Antidorcas marsupialis</i>   | M | 38.1   | 2.1  | 4.0  | 10.3  | 3.2 | 4.5  | 3.0  | --   | 6.69 | 1.51 |
| <i>Ammodorcas clarkei</i>       | B | 28.0   | 1.8  | 2.8  | 2.6   | 1.3 | 1.1  | 1.9  | --   | 4.39 | 1.65 |
| <i>Procapra gutturosa</i>       | M | 27.8   | 3.1  | 5.2  | 9.9   | 2.9 | 4.7  | --   | --   | --   | --   |
| <i>Antilope cervicapra</i>      | G | 37.3   | 2.3  | 4.5  | 11.5  | 3.7 | 5.1  | --   | --   | --   | --   |
| <i>Litocranius walleri</i>      | B | 34.7   | 2.0  | 2.6  | 1.8   | 0.8 | 0.7  | 2.1  | 0.04 | 5.04 | 1.47 |
| <i>Saiga tatarica</i>           | M | 37.4   | 2.3  | 4.1  | 10.7  | 3.3 | 4.7  | 3.7  | --   | --   | 1.60 |

|                                 |   |       |     |      |      |     |      |     |      |      |      |
|---------------------------------|---|-------|-----|------|------|-----|------|-----|------|------|------|
| <i>Oryx dammah</i>              | M | 178.0 | --  | --   | --   | --  | --   | --  | --   | --   | --   |
| <i>Oryx gazella</i>             | M | 172.2 | 5.1 | 13.4 | 45.6 | 4.1 | 16.6 | 5.8 | 0.17 | 1.48 | 1.59 |
| <i>Oryx leucoryx</i>            | M | 83.0  | --  | --   | --   | --  | --   | 4.7 | --   | --   | 1.61 |
| <i>Addax nasomaculatus</i>      | M | 101.2 | 3.9 | 10.0 | 28.5 | 4.2 | 13.8 | --  | --   | --   | --   |
| <i>Hippotragus niger</i>        | G | 225.9 | 5.2 | 11.0 | 35.8 | 3.9 | 11.4 | 5.7 | 0.14 | 1.77 | 1.52 |
| <i>Hippotragus equinus</i>      | G | 265.4 | 5.7 | 15.1 | 36.3 | 4.4 | 13.0 | 5.9 | 0.17 | --   | 1.38 |
| <i>Alcelaphus buselaphus</i>    | G | 148.3 | 5.6 | 8.5  | 32.2 | 4.6 | 10.6 | 5.2 | 0.23 | 2.38 | 1.51 |
| <i>Alcelaphus lichtensteini</i> | G | 170.5 | --  | --   | --   | --  | --   | 6.5 | 0.14 | --   | 1.44 |
| <i>Damaliscus hunteri</i>       | G | 88.5  | 4.6 | 8.4  | 26.2 | 4.0 | 10.8 | 4.4 | 0.38 | 1.92 | 1.63 |
| <i>Damaliscus dorcas</i>        | G | 70.2  | 4.3 | 6.4  | 21.6 | 3.9 | 7.2  | 5.3 | --   | 3.60 | 1.42 |
| <i>Damaliscus lunatus</i>       | G | 128.6 | 5.3 | 8.2  | 37.6 | 4.6 | 15.8 | 5.6 | 0.22 | 2.33 | 1.50 |
| <i>Connochaetes taurinus</i>    | G | 210.1 | 6.3 | 11.5 | 49.1 | 5.6 | 20.7 | 7.3 | 0.57 | 1.65 | 1.31 |
| <i>Connochaetes gnou</i>        | G | 150.8 | --  | --   | 39.0 | 4.9 | 14.2 | --  | --   | 1.72 | --   |
| <i>Aepyceros melampus</i>       | M | 50.3  | 3.1 | 5.6  | 15.0 | 3.5 | 6.0  | 3.2 | 0.06 | 4.38 | 1.46 |
| <i>Sylvicapra grimmia</i>       | B | 19.0  | 1.9 | 2.9  | 4.4  | 1.7 | 1.5  | 1.7 | --   | --   | 1.61 |
| <i>Cephalophus monticola</i>    | B | 4.7   | --  | --   | 0.9  | 0.8 | 0.3  | 1.1 | --   | 4.05 | 1.38 |
| <i>Cephalophus maxwelli</i>     | B | 6.9   | --  | --   | --   | --  | --   | --  | --   | --   | --   |
| <i>Cephalophus natalensis</i>   | B | 12.6  | --  | --   | --   | --  | --   | 1.7 | --   | --   | 1.59 |
| <i>Cephalophus nigrifrons</i>   | B | 14.2  | --  | --   | --   | --  | --   | --  | --   | --   | --   |
| <i>Cephalophus rufilatus</i>    | B | 10.2  | --  | --   | --   | --  | --   | --  | --   | --   | --   |
| <i>Cephalophus zebra</i>        | B | 14.3  | --  | --   | --   | --  | --   | --  | --   | --   | --   |
| <i>Cephalophus leucogaster</i>  | B | 17.0  | --  | --   | --   | --  | --   | 1.8 | --   | --   | 1.34 |
| <i>Cephalophus jentinki</i>     | B | 75.4  | --  | --   | --   | --  | --   | --  | --   | --   | --   |
| <i>Cephalophus dorsalis</i>     | B | 19.9  | 2.5 | 4.0  | 4.6  | 1.3 | 1.4  | 1.8 | --   | --   | 1.48 |
| <i>Cephalophus spadix</i>       | B | 58.4  | 2.8 | 4.5  | 5.4  | 1.5 | 1.9  | --  | --   | --   | --   |
| <i>Cephalophus sylvicultor</i>  | B | 62.2  | 3.6 | 8.5  | 14.9 | 2.3 | 5.4  | 3.1 | --   | 2.29 | --   |
| <i>Cephalophus niger</i>        | B | 19.1  | --  | --   | --   | --  | --   | --  | --   | --   | --   |
| <i>Cephalophus ogilbyi</i>      | B | 21.5  | --  | --   | --   | --  | --   | --  | 0.02 | --   | --   |
| <i>Cephalophus callipygus</i>   | B | 18.5  | --  | --   | --   | --  | --   | --  | --   | --   | --   |
| <i>Pelea capreolus</i>          | B | 24.5  | --  | --   | 6.8  | 2.7 | 3.3  | --  | --   | 4.97 | --   |
| <i>Kobus megaceros</i>          | M | 90.0  | --  | --   | --   | --  | --   | --  | --   | --   | --   |
| <i>Kobus leche</i>              | G | 91.5  | 3.7 | 5.8  | 14.0 | 2.9 | 5.1  | --  | --   | 3.84 | --   |
| <i>Kobus ellipsiprymnus</i>     | G | 212.0 | 5.2 | 11.3 | 30.9 | 3.8 | 11.9 | 4.8 | 0.20 | 3.48 | 1.63 |
| <i>Kobus defassa</i>            | G | 214.0 | --  | --   | --   | --  | --   | --  | --   | --   | --   |
| <i>Kobus kob</i>                | G | 79.7  | 3.5 | 6.1  | 11.6 | 2.8 | 3.4  | --  | --   | --   | --   |
| <i>Kobus vardonii</i>           | G | 69.8  | 3.5 | 5.8  | 12.9 | 3.0 | 5.1  | 3.5 | 0.12 | --   | 1.66 |
| <i>Redunca fulvorufula</i>      | G | 29.3  | 2.5 | 3.6  | 8.0  | 2.8 | 3.4  | 2.1 | --   | 5.71 | 1.66 |
| <i>Redunca arundinum</i>        | G | 50.7  | 3.0 | 5.0  | 10.0 | 2.7 | 4.2  | 3.1 | 0.27 | --   | 1.29 |
| <i>Redunca redunca</i>          | G | 45.9  | --  | --   | --   | --  | --   | --  | --   | --   | --   |
| <i>Pantholops hodgsoni</i>      | M | 34.1  | --  | --   | 8.6  | 3.1 | 4.3  | 4.0 | --   | --   | 1.33 |
| <i>Capra aegagrus</i>           | M | 45.8  | --  | --   | --   | --  | --   | 3.3 | --   | --   | 1.78 |
| <i>Capra ibex</i>               | M | 64.7  | 2.8 | 5.6  | 18.3 | 4.7 | 4.0  | --  | --   | 1.46 | --   |
| <i>Capra pyrenaica</i>          | M | 56.3  | --  | --   | --   | --  | --   | --  | --   | --   | --   |
| <i>Capra caucasica</i>          | M | 70.6  | --  | --   | --   | --  | --   | 3.4 | --   | --   | 1.86 |
| <i>Capra cylindricornis</i>     | M | 66.4  | --  | --   | --   | --  | --   | 3.4 | --   | --   | --   |
| <i>Capra falconeri</i>          | M | 64.5  | --  | --   | --   | --  | --   | --  | --   | --   | --   |
| <i>Ammotragus lervia</i>        | M | 81.7  | 2.9 | 7.6  | 23.4 | 3.9 | 9.2  | 2.7 | --   | --   | --   |
| <i>Hemitragus hylocrius</i>     | M | 75.0  | --  | --   | --   | --  | --   | --  | --   | --   | --   |
| <i>Hemitragus jayakari</i>      | M | 21.8  | --  | --   | --   | --  | --   | --  | --   | --   | --   |
| <i>Hemitragus jemlahicus</i>    | M | 79.6  | 2.8 | 6.0  | 19.0 | 4.1 | 8.2  | 3.4 | --   | --   | 1.35 |
| <i>Pseudois nayaur</i>          | M | 49.8  | 2.7 | 4.8  | 14.3 | 4.1 | 6.7  | 3.4 | --   | --   | 1.60 |
| <i>Rupicapra rupicapra</i>      | M | 36.0  | 2.2 | 3.4  | 6.2  | 2.5 | 2.4  | 2.7 | --   | 1.21 | 1.57 |
| <i>Ovibos moschatus</i>         | M | 301.7 | 5.4 | 17.0 | 61.4 | 4.5 | 23.0 | 4.5 | --   | 0.90 | 1.57 |

|                                 |   |       |     |      |      |     |      |     |      |      |      |
|---------------------------------|---|-------|-----|------|------|-----|------|-----|------|------|------|
| <i>Budorcas taxicolor</i>       | M | 221.3 | 5.6 | 14.6 | 47.1 | 4.4 | 19.2 | 5.3 | --   | 1.10 | 1.89 |
| <i>Nemorhaedus goral</i>        | M | 31.0  | --  | --   | 10.8 | 2.9 | 3.8  | 2.8 | --   | 1.27 | 1.64 |
| <i>Capricornis sumatraensis</i> | M | 94.5  | 3.3 | 8.3  | 21.7 | 3.7 | 9.1  | --  | --   | 1.46 | --   |
| <i>Oreamnos americanus</i>      | M | 78.4  | 2.9 | 5.9  | 11.3 | 2.4 | 5.0  | 3.8 | --   | 1.02 | 1.57 |
| <i>Ovis ammon</i>               | M | 92.0  | --  | --   | --   | --  | --   | 3.3 | --   | --   | 1.51 |
| <i>Ovis orientalis</i>          | M | 56.4  | --  | --   | --   | --  | --   | 3.2 | 0.15 | --   | 1.62 |
| <i>Ovis dalli</i>               | M | 66.9  | 3.1 | 5.5  | --   | --  | --   | --  | --   | --   | --   |
| <i>Ovis canadensis</i>          | M | 71.0  | 3.2 | 7.4  | 21.7 | 3.8 | 9.4  | 3.8 | --   | 1.05 | 1.33 |
| <i>Ovis nivicola</i>            | M | 78.0  | --  | --   | --   | --  | --   | --  | --   | --   | --   |
| <i>Moschus moschiferus</i>      | M | 13.8  | 2.5 | 2.2  | 1.7  | 1.0 | 0.6  | 1.5 | --   | 1.17 | 1.63 |
| <i>Antilocapra americana</i>    | M | 53.0  | 3.2 | 4.9  | 16.0 | 3.6 | 6.5  | 3.2 | --   | 1.29 | --   |
| <i>Hydropotes inermis</i>       | M | 12.7  | 2.5 | 2.9  | 2.6  | 1.1 | 0.8  | 1.6 | --   | 2.00 | 1.43 |
| <i>Capreolus capreolus</i>      | B | 23.8  | 2.6 | 5.4  | 7.0  | 1.6 | 2.5  | 1.9 | --   | --   | 1.44 |
| <i>Alces alces</i>              | B | 434.5 | 6.0 | 28.0 | 66.6 | 2.5 | 18.8 | 5.4 | --   | 1.23 | 1.66 |
| <i>Rangifer tarandus</i>        | M | 115.4 | 5.9 | 9.6  | 12.3 | 1.4 | 2.7  | --  | --   | 1.71 | --   |
| <i>Odocoileus virginianus</i>   | B | 52.3  | 3.2 | 6.4  | 6.4  | 1.2 | 2.0  | --  | --   | 3.58 | --   |
| <i>Odocoileus hemionus</i>      | B | 58.6  | 3.8 | 7.8  | 9.7  | 1.2 | 3.0  | --  | --   | 1.44 | --   |
| <i>Pudu pudu</i>                | B | 10.5  | 1.6 | 2.5  | 2.0  | 1.0 | 0.7  | --  | --   | 1.83 | --   |
| <i>Pudu mephistophiles</i>      | B | 13.5  | 1.6 | 2.4  | 1.5  | 0.9 | 0.5  | --  | --   | --   | --   |
| <i>Mazama americana</i>         | B | 30.8  | 2.0 | 3.8  | 3.2  | 0.9 | 0.9  | 1.9 | --   | 3.14 | 1.46 |
| <i>Mazama gouazoubira</i>       | B | 14.3  | --  | --   | --   | --  | --   | --  | --   | --   | --   |
| <i>Hippocamelus bisulcus</i>    | M | 60.0  | 3.4 | 6.8  | 8.6  | 1.6 | 2.9  | --  | --   | 2.27 | --   |
| <i>Blastocerus dichotomus</i>   | M | 130.0 | 3.6 | 8.0  | 10.1 | 1.5 | 3.4  | --  | --   | --   | --   |
| <i>Ozotoceros bezoarticus</i>   | M | 37.5  | --  | --   | 7.0  | 1.6 | 2.5  | --  | --   | --   | --   |
| <i>Elaphodus cephalophus</i>    | M | 18.0  | 2.7 | 4.6  | 3.9  | 1.2 | 1.4  | --  | --   | --   | --   |
| <i>Muntiacus reevesi</i>        | M | 13.2  | 2.2 | 3.0  | 2.6  | 0.8 | 0.9  | --  | --   | 3.53 | --   |
| <i>Muntiacus crinifrons</i>     | M | 23.6  | --  | --   | --   | --  | --   | --  | --   | --   | --   |
| <i>Muntiacus muntjak</i>        | M | 18.0  | 2.5 | 4.1  | 4.7  | 1.3 | 1.6  | 2.0 | --   | --   | 1.50 |
| <i>Axis porcinus</i>            | M | 37.4  | 2.6 | 4.8  | 7.4  | 1.9 | 2.9  | --  | --   | --   | --   |
| <i>Axis axis</i>                | M | 64.7  | --  | --   | --   | --  | --   | 3.1 | --   | --   | 1.38 |
| <i>Dama dama</i>                | M | 56.3  | 3.6 | 7.0  | 9.8  | 1.9 | 3.7  | 3.2 | --   | --   | --   |
| <i>Elaphurus davidianus</i>     | G | 178.6 | 5.4 | 14.8 | 36.8 | 2.8 | 10.7 | --  | --   | 1.92 | --   |
| <i>Cervus nippon</i>            | M | 46.9  | 3.0 | 5.5  | 9.1  | 2.2 | 3.3  | 3.0 | --   | 3.30 | 1.63 |
| <i>Cervus elaphus</i>           | M | 162.6 | --  | --   | --   | --  | --   | 4.3 | --   | --   | 1.41 |
| <i>Cervus canadensis</i>        | M | 293.5 | 7.1 | 18.1 | 39.7 | 2.8 | 13.3 | 6.5 | --   | 1.93 | 1.27 |
| <i>Cervus eldi</i>              | M | 88.5  | --  | --   | --   | --  | --   | --  | --   | --   | --   |
| <i>Cervus duvauceli</i>         | G | 182.5 | --  | --   | --   | --  | --   | 4.1 | --   | --   | --   |
| <i>Cervus timorensis</i>        | M | 63.0  | --  | --   | --   | --  | --   | --  | --   | --   | --   |
| <i>Cervus unicolor</i>          | M | 169.0 | 5.1 | 13.7 | 29.7 | 2.8 | 10.5 | --  | --   | --   | --   |
